# Supplementary material for: Contribution of the in situ release of endogenous cations from xenograft bone driven by fluoride incorporation toward enhanced bone regeneration
Source: Royal Society of Chemistry journal article supplement (doi:10.1039/c8bm00910d), 2018-01-01
Supplement: c8bm00910d1.pdf [file c8bm00910d1.pdf]

### Supplementary information

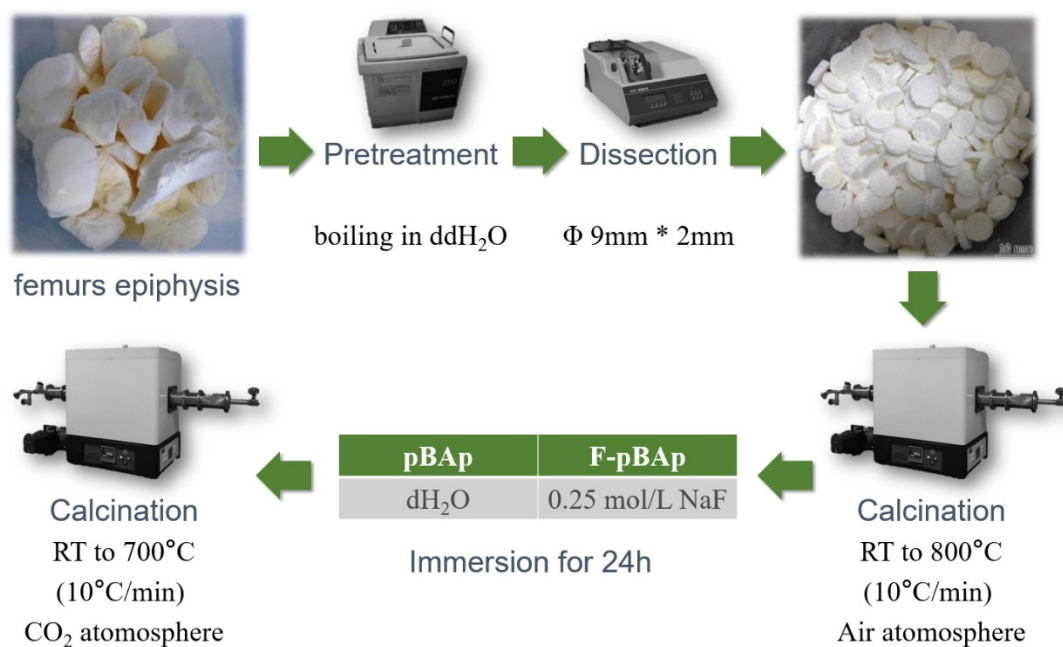

**Figure S1.** Schematic diagram showing the preparation procedure of pBAp and F-pBAp.

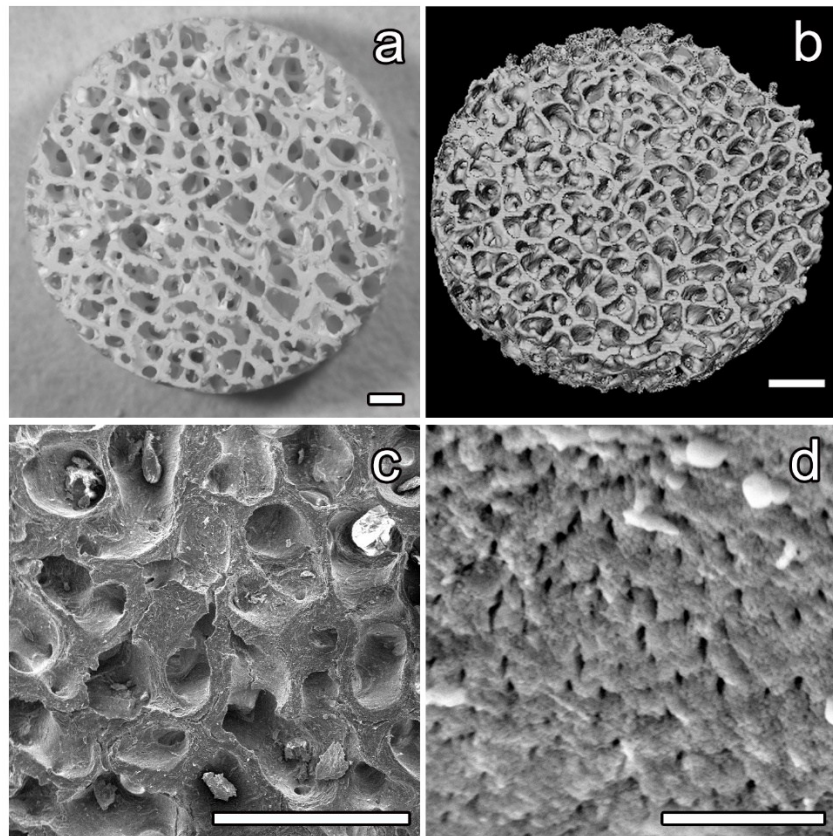

**Figure S2.** (a): Image showing the heat-treated porcine bone discs under stereomicroscope (scale bar = 1 mm). (b): micro-CT reconstruction image showing the macroporous structure of the bone discs (scale bar = 1 mm). Representative SEM images showing the macroporous (c, scale bar = 1 mm) and microporous structure (d, scale bar = 10  $\mu$ m) of the bone discs.

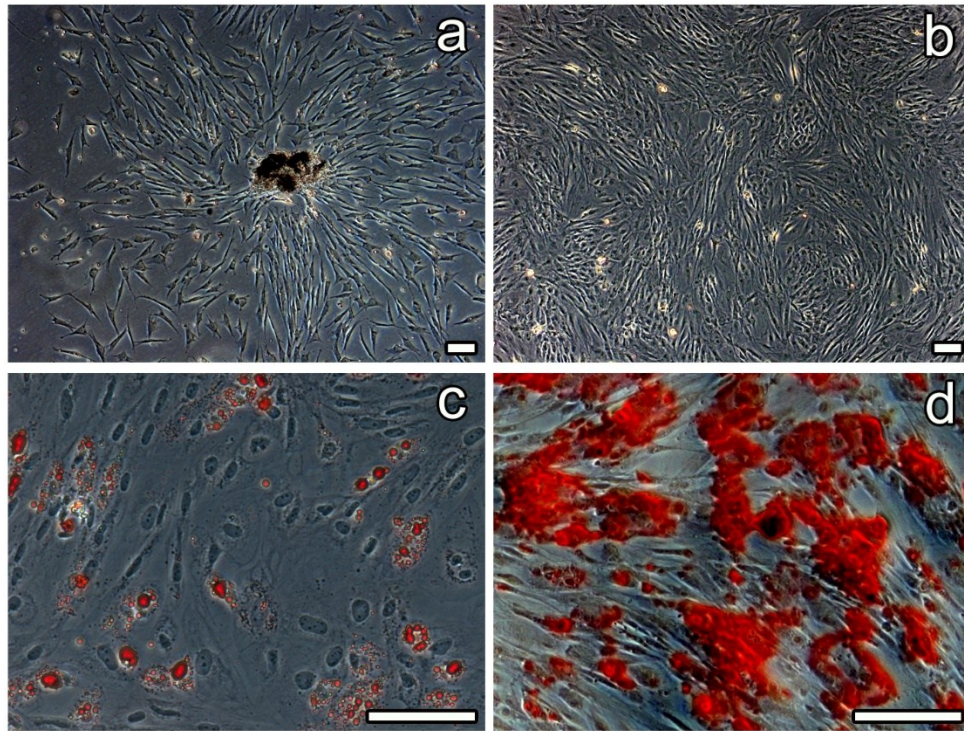

**Figure S3.** (a): rBMSCs migrated from the bone fragments and formed colony at 48h in primary culture. (b): A homogeneous layer of vortex-shaped cells developed at the third passage. (c): Adipogenesis potential of rBMSCs was assayed by staining the lipid vacuoles with Oil-red-O after 14-day induction. (d): Osteogenesis potential was assayed by staining the mineralized nodules with Alizarin red after 21-day induction.
